# Supplementary material
Source: PubMed Central journal article supplement (PMC420505)
Supplement: jcinvest_113_12_1774__1.pdf [file jcinvest_113_12_1774__1.pdf]

### Supplemental Figure 1

Normal peroxisome numbers in *AlbCrePten<sup>flox/flox</sup>* mice. Light microscopic views of DAB-stained peroxisomes in hepatocytes of *AlbCrePten<sup>+/+</sup>* (+/+) and *AlbCrePten<sup>flox/flox</sup>* (*flox/flox*) mice (×1000). Liver sections were counter-stained with hematoxylin. Note that peroxisome proliferation was not increased in *flox/flox* mice.

### Supplemental Figure 2

Insulin hypersensitivity in *AlbCrePten<sup>flox/flox</sup>* mice. **(A)** Reduced glucose tolerance. Glucose tolerance was assessed in 10-week-old +/+ (black) and *flox/flox* (red) mice as described in Methods. Results shown are the mean blood glucose concentration ± SEM of 6 animals/group and are representative of 3 trials. **(B)** Increased insulin sensitivity. Insulin tolerance was assessed in 12-week-old +/+ and *flox/flox* mice as described in Methods. Results are expressed as the mean percentage of the basal glucose concentration ± SEM for 6 animals/group and are representative of 3 trials. **(C)** Decreased serum insulin. Serum insulin levels were determined in 10-week-old +/+ and *flox/flox* mice that had been starved overnight. Results shown are the mean ± SEM for 6 animals/group and are representative of 3 trials. Statistical differences were determined using the Student's *t* test: \**P* < 0.05.
