# Supplementary material
Source: PubMed Central journal article supplement (PMC420505)
Supplement: jcinvest_113_12_1774__2.pdf [file jcinvest_113_12_1774__2.pdf]

**Supplementary Table: Primers for the PCR and RT-PCR experiments**

| <b>PCR</b>              |           |          |                                       |
|-------------------------|-----------|----------|---------------------------------------|
| <i>Pten flox</i> allele | sense     |          | 5'-GTCACCAGGATGCTTCTGAC-3'            |
|                         | antisense |          | 5'-GAAACGGCCTTAACGACGTAG-3'           |
| <i>Pten wt</i> allele   | sense     |          | 5'-GTCACCAGGATGCTTCTGAC-3'            |
|                         | antisense |          | 5'-GTGACATCAACATGCAACACTG-3'          |
| <i>AlbCre</i>           | sense     |          | 5'-ATGAAATGCGAGGTAAGTATGG-3'          |
|                         | antisense |          | 5'-CGCATAACCAGTGAAACAGC-3'            |
| <b>RT-PCR</b>           |           |          |                                       |
| <i>PPAR-γ</i>           | sense     | 30cycles | 5'-ACCCAATGGTTGCTGATTAC-3'            |
|                         | antisense |          | 5'-CGGGAAGGACTTTATGTATGAG-3'          |
| <i>PPAR-α</i>           | sense     | 30cycles | 5'-ATCGCGTACGGCAATGGCTTTA-3'          |
|                         | antisense |          | 5'-GCCTCGGAGGTCCCTGAACAG-3'           |
| <i>SREBP1c</i>          | sense     | 30cycles | 5'-ATCGGCGCGGAAGCTGTCGGGGTAGCGTC-3'   |
|                         | antisense |          | 5'-GATGTCGTTCAAACCGCTGTGTGTCCAGTTC-3' |
| <i>C/EBPα</i>           | sense     | 30cycles | 5'-ATGGAGTACAGCGGTGAGTATTC-3'         |
|                         | antisense |          | 5'-GTTGCCACTGGACATCTCTTC-3'           |
| <i>C/EBPβ</i>           | sense     | 30cycles | 5'-GGTGGACAAGCTGAGCGACGAGTA-3'        |
|                         | antisense |          | 5'-AACAAGTTCCGCAGGGTGCTGAG-3'         |
| <i>C/EBPδ</i>           | sense     | 30cycles | 5'-CAAGCGCCGCAACCAGGAGAT-3'           |
|                         | antisense |          | 5'-CTGTCGCTCGCAGGTCCCAAAGA-3'         |
| <i>adiponectin</i>      | sense     | 35cycles | 5'-CGCTTATGTGTATCGCTCAGG-3'           |
|                         | antisense |          | 5'-AGAAGTGGCCAGTGTGTTGTCA-3'          |
| <i>adipsin</i>          | sense     | 30cycles | 5'-TGAACCTACAAGCGATGGTATG-3'          |
|                         | antisense |          | 5'-CCGGTTCAATGATTGACACTCTGA-3'        |
| <i>aP2</i>              | sense     | 30cycles | 5'-TCCTGTGCTGCAGCCTTTCTCA-3'          |
|                         | antisense |          | 5'-CCAGGTTCCCAAAAGGCATCA-3'           |
| <i>FAS</i>              | sense     | 30cycles | 5'-TGTCTGACACTGGCAATCTGAT-3'          |
|                         | antisense |          | 5'-CGGTCACACGGGTAGGTAGC-3'            |
| <i>ACC</i>              | sense     | 30cycles | 5'-GGGACTTCATGAATTTGCTGATTCTCAGTT-3'  |
|                         | antisense |          | 5'-GTCATTACCATCTTCATTACCTCAATCTC-3'   |
| <i>SCD1</i>             | sense     | 30cycles | 5'-CGCTCTTTACCCTTTGCTG-3'             |
|                         | antisense |          | 5'-ATAGTCAGTTGCTCGCCTCAC-3'           |
| <i>AOX</i>              | sense     | 30cycles | 5'-CCGCCTATGCCTTCCACTTTCTC-3'         |
|                         | antisense |          | 5'-CGCCACTTCCTTGCTCTTCTGT-3'          |
| <i>L-PBE</i>            | sense     | 30cycles | 5'-CCGGTCAATGCCATCAGTCC-3'            |
|                         | antisense |          | 5'-GGTAGAAGCTGCGTTCCTCTTGC-3'         |
| <i>PTL</i>              | sense     | 30cycles | 5'-CACGCATCGCCCAGTTCCTGAG-3'          |
|                         | antisense |          | 5'-CTTCTGCCGTGAAACGCCAAACC-3'         |
| <i>β-actin</i>          | sense     | 25cycles | 5'-GGTTCCGATGCCCTGAGGCTC-3'           |
|                         | antisense |          | 5'-TGCTCCAACCAACTGCTGTCCG-3'          |
